# Supplementary material for: A Multifactorial Approach to Sleep and Its Association with Health-Related Quality of Life in a Multiethnic Asian Working Population: A Cross-Sectional Analysis
Source: PubMed Central journal article supplement (PMC6862149; doi:10.3390/ijerph16214147), 2019-10-28
Supplement: ijerph-16-04147-s001.pdf [file ijerph-16-04147-s001.pdf]

Table S1: Characteristics of study participants (Health, lifestyle and occupational factors)

|                                                     | Total         |
|-----------------------------------------------------|---------------|
| <b>Health and lifestyle factors</b>                 |               |
| Smoking                                             |               |
| Non/ex-smoker                                       | 222 (67.5)    |
| Current smoker                                      | 107 (32.5)    |
| Alcohol drinking                                    |               |
| Non-drinker                                         | 169 (50.6)    |
| Drinks less than once a month                       | 107 (32.0)    |
| Drinks once or more a month                         | 58 (17.4)     |
| Physical activity <sup>a</sup>                      |               |
| Low                                                 | 107 (32.6)    |
| Moderate                                            | 129 (39.3)    |
| High                                                | 92 (28.1)     |
| Self-reported comorbidities                         |               |
| 0                                                   | 200 (60.8)    |
| ≥1                                                  | 129 (39.2)    |
| Overweight and obese                                |               |
| No (BMI <23.0)                                      | 104 (31.3)    |
| Yes (BMI ≥23.0)                                     | 228 (68.7)    |
| Stress at home in previous 12 months                |               |
| Never                                               | 120 (36.5)    |
| Some                                                | 188 (57.1)    |
| Several periods                                     | 21 (6.4)      |
| Current level of financial stress                   |               |
| None                                                | 107 (32.5)    |
| Some                                                | 140 (42.6)    |
| Moderate or severe                                  | 82 (24.9)     |
| <b>Occupational factors</b>                         |               |
| Shift work                                          |               |
| No                                                  | 227 (68.0)    |
| Yes                                                 | 107 (32.0)    |
| Job type                                            |               |
| Office                                              | 160 (47.9)    |
| Control room                                        | 100 (29.9)    |
| Workshop                                            | 74 (22.2)     |
| Stress at work in previous 12 months                |               |
| None                                                | 67 (20.4)     |
| Some                                                | 210 (63.8)    |
| Several periods                                     | 52 (15.8)     |
| Years employed in the current company, median (IQR) | 4.9 (2.3-9.4) |
| Daily working hours                                 | 8.6 ± 1.4     |
| Work location                                       |               |
| Aboveground                                         | 228 (68.3)    |
| Underground                                         | 106 (31.7)    |

Values are presented as mean ± standard deviation (normally distributed) or median [inter-quartile range] (skewed) for continuous variables, and number (%) for categorical variables.

BMI: body mass index

<sup>a</sup>Physical activity: Low=Metabolic equivalent task mins per week <600, Moderate=Metabolic equivalent task mins per week 600-2999, High=Metabolic equivalent task mins per week ≥3000.

Table S2: Univariate associations with Physical Component Summary (PCS) and Mental Component Summary (MCS)

| Variable                            | Dependent Variable: PCS |           |                | Dependent Variable: MCS |           |                |
|-------------------------------------|-------------------------|-----------|----------------|-------------------------|-----------|----------------|
|                                     | Beta                    | Std. Err. | P <sup>a</sup> | Beta                    | Std. Err. | P <sup>a</sup> |
| <b>Socio-demographic factors</b>    |                         |           |                |                         |           |                |
| Age (years)                         |                         |           |                |                         |           |                |
| 21-30                               | Ref                     | Ref       | Ref            | Ref                     | Ref       | Ref            |
| 31-40                               | -2.228                  | 0.920     | 0.182          | 0.299                   | 1.045     | 0.775          |
| ≥41                                 | -0.792                  | 0.784     | 0.313          | 2.872                   | 1.001     | 0.004**        |
| Gender                              |                         |           |                |                         |           |                |
| Male                                | Ref                     | Ref       | Ref            | Ref                     | Ref       | Ref            |
| Female                              | 0.169                   | 0.822     | 0.837          | 1.989                   | 0.992     | 0.046*         |
| Education                           |                         |           |                |                         |           |                |
| Primary and secondary               | Ref                     | Ref       | Ref            | Ref                     | Ref       | Ref            |
| Pre-college                         | -1.768                  | 1.150     | 0.125          | -1.242                  | 1.426     | 0.385          |
| College and above                   | 1.039                   | 1.190     | 0.383          | -1.953                  | 1.475     | 0.186          |
| Ethnicity                           |                         |           |                |                         |           |                |
| Chinese                             | Ref                     | Ref       | Ref            | Ref                     | Ref       | Ref            |
| Malay                               | -2.880                  | 0.884     | 0.001**        | -0.456                  | 1.092     | 0.676          |
| Indian                              | -1.810                  | 1.049     | 0.085          | -0.766                  | 1.296     | 0.555          |
| Others <sup>b</sup>                 | 0.978                   | 1.681     | 0.561          | 2.285                   | 2.076     | 0.272          |
| Marital status                      |                         |           |                |                         |           |                |
| Single <sup>c</sup>                 | Ref                     | Ref       | Ref            | Ref                     | Ref       | Ref            |
| Married                             | -1.304                  | 0.710     | 0.067          | -0.095                  | 0.867     | 0.913          |
| Monthly income                      |                         |           |                |                         |           |                |
| <\$4,000                            | Ref                     | Ref       | Ref            | Ref                     | Ref       | Ref            |
| ≥\$4,000                            | 0.395                   | 0.732     | 0.590          | 0.803                   | 0.888     | 0.367          |
| <b>Health and lifestyle factors</b> |                         |           |                |                         |           |                |
| Smoking                             |                         |           |                |                         |           |                |
| Non/ex-smoker                       | Ref                     | Ref       | Ref            | Ref                     | Ref       | Ref            |
| Current smoker                      | -1.551                  | 0.730     | 0.034*         | -0.680                  | 0.896     | 0.448          |
| Alcohol consumption                 |                         |           |                |                         |           |                |
| Non-drinker                         | Ref                     | Ref       | Ref            | Ref                     | Ref       | Ref            |
| Drinks less than once a month       | 0.108                   | 0.770     | 0.889          | -1.180                  | 0.932     | 0.206          |
| Drinks once or more a month         | -0.294                  | 0.951     | 0.757          | 0.546                   | 1.151     | 0.636          |
| Physical activity <sup>d</sup>      |                         |           |                |                         |           |                |
| Low                                 | Ref                     | Ref       | Ref            | Ref                     | Ref       | Ref            |
| Moderate                            | 1.874                   | 0.810     | 0.021*         | 1.275                   | 0.992     | 0.200          |
| High                                | 0.620                   | 0.881     | 0.482          | 0.799                   | 1.080     | 0.460          |
| Self-reported comorbidities         |                         |           |                |                         |           |                |
| 0                                   | Ref                     | Ref       | Ref            | Ref                     | Ref       | Ref            |
| ≥1                                  | -1.428                  | 0.699     | 0.042*         | -0.337                  | 0.858     | 0.695          |
| BMI                                 | -0.170                  | 0.063     | 0.007**        | 0.107                   | 0.077     | 0.164          |

|                                       |        |       |           |         |       |           |
|---------------------------------------|--------|-------|-----------|---------|-------|-----------|
| Stress at home in previous 12 months  |        |       |           |         |       |           |
| None                                  | Ref    | Ref   | Ref       | Ref     | Ref   | Ref       |
| Some                                  | -1.418 | 0.713 | 0.047*    | -5.536  | 0.796 | <0.001*** |
| Several periods                       | -5.238 | 1.470 | <0.001*** | -12.179 | 1.640 | <0.001*** |
| Current level of financial stress     |        |       |           |         |       |           |
| None                                  | Ref    | Ref   | Ref       | Ref     | Ref   | Ref       |
| Some                                  | -2.151 | 0.781 | 0.006**   | -3.862  | 0.898 | <0.001*** |
| Moderate or severe                    | -3.327 | 0.897 | <0.001*** | -7.798  | 1.032 | <0.001*** |
| <b>Occupational factors</b>           |        |       |           |         |       |           |
| Shift work                            |        |       |           |         |       |           |
| No                                    | Ref    | Ref   | Ref       | Ref     | Ref   | Ref       |
| Yes                                   | -0.544 | 0.730 | 0.456     | 0.634   | 0.886 | 0.475     |
| Job type                              |        |       |           |         |       |           |
| Office                                | Ref    | Ref   | Ref       | Ref     | Ref   | Ref       |
| Control room                          | 0.068  | 0.781 | 0.931     | -0.045  | 0.964 | 0.963     |
| Workshop                              | -2.634 | 0.861 | 0.002**   | -0.799  | 1.062 | 0.452     |
| Stress at work in previous 12 months  |        |       |           |         |       |           |
| None                                  | Ref    | Ref   | Ref       | Ref     | Ref   | Ref       |
| Some                                  | -0.676 | 0.871 | 0.438     | -4.311  | 0.988 | <0.001*** |
| Several periods                       | -1.123 | 1.159 | 0.333     | -9.433  | 1.315 | <0.001*** |
| Years employed in the current company |        |       |           |         |       |           |
| <3                                    | Ref    | Ref   | Ref       | Ref     | Ref   | Ref       |
| ≥3                                    | -0.704 | 0.740 | 0.342     | 0.175   | 0.905 | 0.847     |
| Daily working hours                   | -0.250 | 0.247 | 0.313     | -0.422  | 0.306 | 0.168     |
| Work location                         |        |       |           |         |       |           |
| Aboveground                           | Ref    | Ref   | Ref       | Ref     | Ref   | Ref       |
| Underground                           | -0.941 | 0.728 | 0.197     | -0.299  | 0.887 | 0.736     |

BMI: body mass index

<sup>a</sup> P was derived using Generalized Linear Modelling.

<sup>b</sup> Includes mixed ethnicities, Indonesians, Pakistanis and Filipinos

<sup>c</sup> Includes never married, widowed and divorced

<sup>d</sup> Physical activity: Low=Metabolic equivalent task mins per week <600, Moderate=Metabolic equivalent task mins per week 600-2999, High=Metabolic equivalent task mins per week ≥3000.

\*p<0.05. \*\*p<0.01. \*\*\*p<0.001.

Table S3: Multivariable analysis for objective sleep parameters and Physical Component Summary

| Variable                             | Model 1<br>Beta (p <sup>a</sup> ) | Model 2<br>Beta (p <sup>a</sup> ) | Model 3<br>Beta (p <sup>a</sup> ) | Model 4<br>Beta (p <sup>a</sup> ) |
|--------------------------------------|-----------------------------------|-----------------------------------|-----------------------------------|-----------------------------------|
| <b>Socio-demographic factors</b>     |                                   |                                   |                                   |                                   |
| Age (years)                          |                                   |                                   |                                   |                                   |
| 21-30                                | 1.00                              | 1.00                              | 1.00                              | 1.00                              |
| 31-40                                | -1.034 (0.294)                    | -0.761 (0.441)                    | -0.698 (0.480)                    | -0.055 (0.960)                    |
| ≥41                                  | -0.290 (0.786)                    | -0.136 (0.906)                    | -0.163 (0.886)                    | -0.036 (0.978)                    |
| Gender                               |                                   |                                   |                                   |                                   |
| Male                                 | 1.00                              | 1.00                              | 1.00                              | 1.00                              |
| Female                               | -0.758 (0.319)                    | -1.221 (0.135)                    | -2.175 (0.012)*                   | -1.488 (0.092)                    |
| Education                            |                                   |                                   |                                   |                                   |
| Primary and secondary                | 1.00                              | 1.00                              | 1.00                              | 1.00                              |
| Pre-college                          | -1.464 (0.188)                    | -1.409 (0.229)                    | -2.226 (0.063)                    | -2.094 (0.087)                    |
| College and above                    | -0.701 (0.585)                    | -0.576 (0.673)                    | -0.700 (0.618)                    | -0.486 (0.742)                    |
| Ethnicity                            |                                   |                                   |                                   |                                   |
| Chinese                              | 1.00                              | 1.00                              | 1.00                              | 1.00                              |
| Malay                                | -2.263 (0.036)*                   | -1.943 (0.106)                    | -1.423 (0.235)                    | 0.038 (0.979)                     |
| Indian                               | -1.316 (0.248)                    | -1.226 (0.263)                    | -0.373 (0.731)                    | 0.271 (0.808)                     |
| Others <sup>b</sup>                  | 0.952 (0.500)                     | 1.661 (0.235)                     | 2.429 (0.077)                     | 3.064 (0.037)*                    |
| Marital status                       |                                   |                                   |                                   |                                   |
| Single <sup>c</sup>                  | 1.00                              | 1.00                              | 1.00                              | 1.00                              |
| Married                              | -0.690 (0.395)                    | -0.850 (0.301)                    | -0.707 (0.402)                    | -0.981 (0.261)                    |
| Monthly income                       |                                   |                                   |                                   |                                   |
| <S\$4,000                            | 1.00                              | 1.00                              | 1.00                              | 1.00                              |
| ≥S\$4,000                            | -0.414 (0.622)                    | -0.057 (0.948)                    | -0.415 (0.645)                    | -0.587 (0.520)                    |
| <b>Health and lifestyle factors</b>  |                                   |                                   |                                   |                                   |
| Smoking                              |                                   |                                   |                                   |                                   |
| Non/ex-smoker                        | --                                | 1.00                              | --                                | --                                |
| Current smoker                       |                                   | -0.017 (0.984)                    |                                   |                                   |
| Alcohol drinking                     |                                   |                                   |                                   |                                   |
| Non-drinker                          | --                                | 1.00                              | 1.00                              | --                                |
| Drinks less than once a month        |                                   | -0.720 (0.365)                    | -0.823 (0.290)                    |                                   |
| Drinks once or more a month          |                                   | -1.231 (0.231)                    | -1.082 (0.276)                    |                                   |
| Physical activity <sup>d</sup>       |                                   |                                   |                                   |                                   |
| Low                                  | --                                | 1.00                              | 1.00                              | 1.00                              |
| Moderate                             |                                   | 1.448 (0.065)                     | 1.363 (0.082)                     | 1.735 (0.042)*                    |
| High                                 |                                   | 0.897 (0.306)                     | 1.123 (0.223)                     | 0.454 (0.649)                     |
| Self-reported comorbidities          |                                   |                                   |                                   |                                   |
| 0                                    | --                                | 1.00                              | 1.00                              | 1.00                              |
| ≥1                                   |                                   | -1.305 (0.069)                    | -1.251 (0.077)                    | -1.589 (0.042)*                   |
| BMI                                  | --                                | -0.100 (0.207)                    | -0.113 (0.145)                    | -0.019 (0.807)                    |
| Stress at home in previous 12 months |                                   |                                   |                                   |                                   |
| None                                 |                                   | 1.00                              | 1.00                              | 1.00                              |
| Some                                 | --                                | -0.727 (0.324)                    | -0.396 (0.608)                    | -0.553 (0.490)                    |
| Several periods                      |                                   | -3.687 (0.053)                    | -3.318 (0.075)                    | -3.252 (0.157)                    |
| Current level of financial stress    |                                   |                                   |                                   |                                   |
| None                                 | --                                | 1.00                              | 1.00                              |                                   |

|                                       |    |    |                 |                 |                  |
|---------------------------------------|----|----|-----------------|-----------------|------------------|
| Some                                  |    |    | -1.784 (0.035)* | -1.925 (0.027)* | -2.085 (0.026)*  |
| Moderate or severe                    |    |    | -1.675 (0.082)  | -1.604 (0.126)  | -1.535 (0.145)   |
| <b>Occupational factors</b>           |    |    |                 |                 |                  |
| Shift work                            |    |    |                 |                 |                  |
| No                                    | -- | -- |                 | 1.00            | --               |
| Yes                                   |    |    |                 | -612 (0.600)    |                  |
| Job type                              |    |    |                 |                 |                  |
| Office                                | -- | -- |                 | 1.00            | 1.00             |
| Control room                          |    |    |                 | 0.500 (0.682)   | -0.546 (0.537)   |
| Workshop                              |    |    |                 | -2.806 (0.015)* | -3.058 (0.009)** |
| Stress at work in previous 12 months  |    |    |                 |                 |                  |
| None                                  |    |    |                 | 1.00            | --               |
| Some                                  |    |    |                 | -0.334 (0.732)  |                  |
| Several periods                       |    |    |                 | 0.082 (0.954)   |                  |
| Years employed in the current company |    |    |                 |                 |                  |
| <3                                    | -- | -- |                 | 1.00            | --               |
| ≥3                                    |    |    |                 | -0.370 (0.655)  |                  |
| Daily working hours                   | -- | -- |                 | -0.595 (0.039)* | -0.489 (0.154)   |
| Work location                         |    |    |                 |                 |                  |
| Aboveground                           | -- | -- |                 | 1.00            | --               |
| Underground                           |    |    |                 | -0.776 (0.293)  |                  |
| <b>Sleep parameters</b>               |    |    |                 |                 |                  |
| Total sleep time (hours)              | -- | -- |                 | --              | -0.777 (0.137)   |
| Wake after sleep onset (mins)         | -- | -- |                 | --              | 0.049 (0.086)    |
| Sleep efficiency (%)                  | -- | -- |                 | --              | 0.211 (0.010)*   |

BMI: body mass index

<sup>a</sup> P was derived using Generalized Linear Modelling.

<sup>a</sup> Includes mixed ethnicities, Indonesians, Pakistanis and Filipinos

<sup>b</sup> Includes never married, widowed and divorced

<sup>c</sup> Physical activity: Low=Metabolic equivalent task mins per week <600, Moderate=Metabolic equivalent task mins per week 600-2999, High=Metabolic equivalent task mins per week ≥3000.

\*p<0.05. \*\*p<0.01. \*\*\*p<0.001.

Table S4: Multivariable analysis for subjective sleep parameters and Physical Component Summary

| <b>Variable</b>                      | <b>Model 1<br/>Beta (p<sup>a</sup>)</b> | <b>Model 2<br/>Beta (p<sup>a</sup>)</b> | <b>Model 3<br/>Beta (p<sup>a</sup>)</b> | <b>Model 4<br/>Beta (p<sup>a</sup>)</b> |
|--------------------------------------|-----------------------------------------|-----------------------------------------|-----------------------------------------|-----------------------------------------|
| <b>Socio-demographic factors</b>     |                                         |                                         |                                         |                                         |
| Age                                  |                                         |                                         |                                         |                                         |
| 21-30                                | 1.00                                    | 1.00                                    | 1.00                                    | 1.00                                    |
| 31-40                                | -1.034 (0.294)                          | -0.761 (0.441)                          | -0.698 (0.480)                          | -0.243 (0.795)                          |
| ≥41                                  | -0.290 (0.786)                          | -0.136 (0.906)                          | -0.163 (0.886)                          | 0.147 (0.891)                           |
| Gender                               |                                         |                                         |                                         |                                         |
| Male                                 | 1.00                                    | 1.00                                    | 1.00                                    | 1.00                                    |
| Female                               | -0.758 (0.319)                          | -1.221 (0.135)                          | -2.175 (0.012)*                         | -1.626 (0.044)*                         |
| Education                            |                                         |                                         |                                         |                                         |
| Primary and secondary                | 1.00                                    | 1.00                                    | 1.00                                    | 1.00                                    |
| Pre-college                          | -1.464 (0.188)                          | -1.409 (0.229)                          | -2.226 (0.063)                          | -1.646 (0.160)                          |
| College and above                    | -0.701 (0.585)                          | -0.576 (0.673)                          | -0.700 (0.618)                          | 0.219 (0.870)                           |
| Ethnicity                            |                                         |                                         |                                         |                                         |
| Chinese                              | 1.00                                    | 1.00                                    | 1.00                                    | 1.00                                    |
| Malay                                | -2.263 (0.036)*                         | -1.943 (0.106)                          | -1.423 (0.235)                          | -1.252 (0.302)                          |
| Indian                               | -1.316 (0.248)                          | -1.226 (0.263)                          | -0.373 (0.731)                          | -1.253 (0.250)                          |
| Others <sup>b</sup>                  | 0.952 (0.500)                           | 1.661 (0.235)                           | 2.429 (0.077)                           | 2.177 (0.100)                           |
| Marital status                       |                                         |                                         |                                         |                                         |
| Single <sup>c</sup>                  | 1.00                                    | 1.00                                    | 1.00                                    | 1.00                                    |
| Married                              | -0.690 (0.395)                          | -0.850 (0.301)                          | -0.707 (0.402)                          | -0.822 (0.263)                          |
| Monthly income                       |                                         |                                         |                                         |                                         |
| <S\$4,000                            | 1.00                                    | 1.00                                    | 1.00                                    | 1.00                                    |
| ≥S\$4,000                            | -0.414 (0.622)                          | -0.057 (0.948)                          | -0.415 (0.645)                          | -0.772 (0.335)                          |
| <b>Health and lifestyle factors</b>  |                                         |                                         |                                         |                                         |
| Smoking                              |                                         |                                         |                                         |                                         |
| Non/ex-smoker                        | --                                      | 1.00                                    | --                                      | --                                      |
| Current smoker                       |                                         | -0.017 (0.984)                          |                                         |                                         |
| Alcohol drinking                     |                                         |                                         |                                         |                                         |
| Non-drinker                          | --                                      | 1.00                                    | 1.00                                    | --                                      |
| Drinks less than once a month        |                                         | -0.720 (0.365)                          | -0.823 (0.290)                          |                                         |
| Drinks once or more a month          |                                         | -1.231 (0.231)                          | -1.082 (0.276)                          |                                         |
| Physical activity <sup>d</sup>       |                                         |                                         |                                         |                                         |
| Low                                  | --                                      | 1.00                                    | 1.00                                    | 1.00                                    |
| Moderate                             |                                         | 1.448 (0.065)                           | 1.363 (0.082)                           | 1.074 (0.155)                           |
| High                                 |                                         | 0.897 (0.306)                           | 1.123 (0.223)                           | 1.152 (0.180)                           |
| Self-reported comorbidities          |                                         |                                         |                                         |                                         |
| 0                                    | --                                      | 1.00                                    | 1.00                                    | 1.00                                    |
| ≥1                                   |                                         | -1.305 (0.069)                          | -1.251 (0.077)                          | -0.851 (0.180)                          |
| BMI                                  | --                                      | -0.100 (0.207)                          | -0.113 (0.145)                          | -0.079 (0.273)                          |
| Stress at home in previous 12 months |                                         |                                         |                                         |                                         |
| None                                 |                                         | 1.00                                    | 1.00                                    | 1.00                                    |
| Some                                 | --                                      | -0.727 (0.324)                          | -0.396 (0.608)                          | 0.913 (0.220)                           |
| Several periods                      |                                         | -3.687 (0.053)                          | -3.318 (0.075)                          | -1.435 (0.398)                          |
| Current level of financial stress    |                                         |                                         |                                         |                                         |
| None                                 | --                                      | 1.00                                    | 1.00                                    | 1.00                                    |

|                                       |    |    |                 |                 |                 |
|---------------------------------------|----|----|-----------------|-----------------|-----------------|
| Some                                  |    |    | -1.784 (0.035)* | -1.925 (0.027)* | -0.829 (0.329)  |
| Moderate or severe                    |    |    | -1.675 (0.082)  | -1.604 (0.126)  | -0.248 (0.794)  |
| <b>Occupational factors</b>           |    |    |                 |                 |                 |
| Shift work                            |    |    |                 |                 |                 |
| No                                    | -- | -- |                 | 1.00            | --              |
| Yes                                   |    |    |                 | -612 (0.600)    |                 |
| Job type                              |    |    |                 |                 |                 |
| Office                                | -- | -- |                 | 1.00            | 1.00            |
| Control room                          |    |    |                 | 0.500 (0.682)   | 0.442 (0.572)   |
| Workshop                              |    |    |                 | -2.806 (0.015)* | -2.272 (0.023)* |
| Stress at work in previous 12 months  |    |    |                 |                 |                 |
| None                                  |    |    |                 | 1.00            | --              |
| Some                                  |    |    |                 | -0.334 (0.732)  |                 |
| Several periods                       |    |    |                 | 0.082 (0.954)   |                 |
| Years employed in the current company |    |    |                 |                 |                 |
| <3                                    | -- | -- |                 | 1.00            | --              |
| ≥3                                    |    |    |                 | -0.370 (0.655)  |                 |
| Daily working hours                   | -- | -- |                 | -0.595 (0.039)* | -0.452 (0.101)  |
| Work location                         |    |    |                 |                 |                 |
| Aboveground                           | -- | -- |                 | 1.00            | --              |
| Underground                           |    |    |                 | -0.776 (0.293)  |                 |
| <b>Sleep quality</b>                  |    |    |                 |                 |                 |
| Subjective sleep quality              | -- | -- |                 | --              | -1.416 (0.052)  |
| Sleep latency                         | -- | -- |                 | --              | -0.704 (0.092)  |
| Sleep duration                        | -- | -- |                 | --              | -0.416 (0.310)  |
| Habitual sleep efficiency             | -- | -- |                 | --              | 0.697 (0.094)   |
| Sleep disturbances                    | -- | -- |                 | --              | -1.829 (0.010)* |
| Use of sleeping medications           | -- | -- |                 | --              | -0.593 (0.426)  |
| Daytime dysfunction                   | -- | -- |                 | --              | -0.909 (0.086)  |

BMI: body mass index

<sup>a</sup> P was derived using Generalized Linear Modelling.

<sup>b</sup> Includes mixed ethnicities, Indonesians, Pakistanis and Filipinos

<sup>c</sup> Includes never married, widowed and divorced

<sup>d</sup> Physical activity: Low=Metabolic equivalent task mins per week <600, Moderate=Metabolic equivalent task mins per week 600-2999, High=Metabolic equivalent task mins per week ≥3000.

\*p<0.05. \*\*p<0.01. \*\*\*p<0.001.

Table S5: Multivariable analysis for objective sleep parameters and Mental Component Summary

| <b>Variable</b>                      | <b>Model 1<br/>Beta (p<sup>a</sup>)</b> | <b>Model 2<br/>Beta (p<sup>a</sup>)</b> | <b>Model 3<br/>Beta (p<sup>a</sup>)</b> | <b>Model 4<br/>Beta (p<sup>a</sup>)</b> |
|--------------------------------------|-----------------------------------------|-----------------------------------------|-----------------------------------------|-----------------------------------------|
| <b>Socio-demographic factors</b>     |                                         |                                         |                                         |                                         |
| Age                                  |                                         |                                         |                                         |                                         |
| 21-30                                | 1.00                                    | 1.00                                    | 1.00                                    | 1.00                                    |
| 31-40                                | 1.220 (0.302)                           | 1.213 (0.274)                           | 1.195 (0.290)                           | 1.187 (0.338)                           |
| ≥41                                  | 3.723 (0.003)**                         | 3.551 (0.002)**                         | 3.449 (0.002)**                         | 4.050 (0.001)                           |
| Gender                               |                                         |                                         |                                         |                                         |
| Male                                 | 1.00                                    | 1.00                                    | 1.00                                    | 1.00                                    |
| Female                               | 1.942 (0.040)*                          | 2.158 (0.019)*                          | 2.339 (0.019)*                          | 2.003 (0.055)                           |
| Education                            |                                         |                                         |                                         |                                         |
| Primary and secondary                | 1.00                                    | 1.00                                    | 1.00                                    | 1.00                                    |
| Pre-college                          | 0.333 (0.848)                           | 1.101 (0.472)                           | 0.535 (0.711)                           | 0.627 (0.670)                           |
| College and above                    | -0.237 (0.899)                          | 0.677 (0.697)                           | 0.449(0.786)                            | 1.152 (0.509)                           |
| Ethnicity                            |                                         |                                         |                                         |                                         |
| Chinese                              | 1.00                                    | 1.00                                    | 1.00                                    | 1.00                                    |
| Malay                                | 0.733 (0.570)                           | 1.614 (0.207)                           | 1.569 (0.190)                           | 1.171(0.393)                            |
| Indian                               | -0.132 (0.909)                          | -0.340 (0.743)                          | -0.461 (0.673)                          | -1.214 (0.308)                          |
| Others <sup>b</sup>                  | 3.111 (0.209)                           | 3.162 (0.107)                           | 3.585 (0.039)*                          | 2.529 (0.174)                           |
| Marital status                       |                                         |                                         |                                         |                                         |
| Single <sup>c</sup>                  | 1.00                                    | 1.00                                    | 1.00                                    | 1.00                                    |
| Married                              | -1.757 (0.074)                          | -0.577 (0.542)                          | -0.571 (0.544)                          | -0.749 (0.461)                          |
| Monthly income                       |                                         |                                         |                                         |                                         |
| <S\$4,000                            | 1.00                                    | 1.00                                    | 1.00                                    | 1.00                                    |
| ≥S\$4,000                            | 0.731 (0.407)                           | 0.420 (0.623)                           | 1.476 (0.105)                           | 0.997 (0.316)                           |
| <b>Health and lifestyle factors</b>  |                                         |                                         |                                         |                                         |
| Smoking                              |                                         |                                         |                                         |                                         |
| Non/ex-smoker                        | --                                      | 1.00                                    | --                                      | --                                      |
| Current smoker                       |                                         | 0.380 (0.673)                           |                                         |                                         |
| Alcohol drinking                     |                                         |                                         |                                         |                                         |
| Non-drinker                          | --                                      | 1.00                                    | 1.00                                    | 1.00                                    |
| Drinks less than once a month        |                                         | -0.338 (0.700)                          | -0.441 (0.614)                          | -0.576 (0.534)                          |
| Drinks once or more a month          |                                         | 1.354 (0.223)                           | 1.267 (0.234)                           | 1.256 (0.307)                           |
| Physical activity <sup>d</sup>       |                                         |                                         |                                         |                                         |
| Low                                  | --                                      | 1.00                                    | --                                      | --                                      |
| Moderate                             |                                         | 0.668 (0.419)                           |                                         |                                         |
| High                                 |                                         | 0.531 (0.616)                           |                                         |                                         |
| Self-reported comorbidities          |                                         |                                         |                                         |                                         |
| 0                                    | --                                      | 1.00                                    | --                                      | --                                      |
| ≥1                                   |                                         | -0.445 (0.587)                          |                                         |                                         |
| BMI                                  |                                         |                                         |                                         |                                         |
|                                      | --                                      | 0.043 (0.550)                           | --                                      | --                                      |
| Stress at home in previous 12 months |                                         |                                         |                                         |                                         |
| None                                 |                                         | 1.00                                    | 1.00                                    | 1.00                                    |
| Some                                 | --                                      | -4.153 (<0.001)***                      | -3.855 (<0.001)***                      | -3.638 (<0.001)***                      |
| Several periods                      |                                         | -10.026 (<0.001)***                     | -8.959 (<0.001)***                      | -9.123 (<0.001)***                      |
| Current level of financial stress    |                                         |                                         |                                         |                                         |
| None                                 | --                                      | 1.00                                    | 1.00                                    | 1.00                                    |
| Some                                 |                                         | -1.604 (0.059)                          | -1.365 (0.104)                          | -1.117 (0.233)                          |



|                                       |    |    |                    |                    |                    |
|---------------------------------------|----|----|--------------------|--------------------|--------------------|
| Moderate or severe                    |    |    | -4.598 (<0.001)*** | -4.116 (<0.001)*** | -4.742 (<0.001)*** |
| <b>Occupational factors</b>           |    |    |                    |                    |                    |
| Shift work                            |    |    |                    |                    |                    |
| No                                    | -- | -- |                    | 1.00               | 1.00               |
| Yes                                   |    |    |                    | 1.483 (0.180)      | 0.991 (0.285)      |
| Job type                              |    |    |                    |                    |                    |
| Office                                | -- | -- |                    | 1.00               | --                 |
| Control room                          |    |    |                    | -1.155 (0.337)     |                    |
| Workshop                              |    |    |                    | -1.040 (0.370)     |                    |
| Stress at work in previous 12 months  |    |    |                    |                    |                    |
| None                                  |    |    |                    | 1.00               | 1.00               |
| Some                                  |    |    |                    | -1.251 (0.232)     | -1.679 (0.148)     |
| Several periods                       |    |    |                    | -4.905 (0.002) **  | -3.780 (0.037)*    |
| Years employed in the current company |    |    |                    |                    |                    |
| <3                                    | -- | -- |                    | 1.00               | 1.00               |
| ≥3                                    |    |    |                    | -1.532 (0.095)     | -1.680 (0.092)     |
| Daily working hours                   | -- | -- |                    | -0.706 (0.007)**   | -0.640 (0.012)*    |
| Work location                         |    |    |                    |                    |                    |
| Aboveground                           | -- | -- |                    | 1.00               | 1.00               |
| Underground                           |    |    |                    | 1.098 (0.206)      | 1.070 (0.246)      |
| <b>Sleep parameters</b>               |    |    |                    |                    |                    |
| Total sleep time (hours)              | -- | -- |                    | --                 | -0.140 (0.824)     |
| Wake after sleep onset (mins)         | -- | -- |                    | --                 | 0.052 (0.086)      |
| Sleep efficiency (%)                  | -- | -- |                    | --                 | 0.023 (0.771)      |

BMI: body mass index

<sup>a</sup> P was derived using Generalized Linear Modelling.

<sup>b</sup> Includes mixed ethnicities, Indonesians, Pakistanis and Filipinos

<sup>c</sup> Includes never married, widowed and divorced

<sup>d</sup> Physical activity: Low=Metabolic equivalent task mins per week <600, Moderate=Metabolic equivalent task mins per week 600-2999, High=Metabolic equivalent task mins per week ≥3000.

\*p<0.05. \*\*p<0.01. \*\*\*p<0.001.

Table S6: Multivariable analysis for subjective sleep parameters and Mental Component Summary

| <b>Variable</b>                      | <b>Model 1<br/>Beta (p<sup>a</sup>)</b> | <b>Model 2<br/>Beta (p<sup>a</sup>)</b> | <b>Model 3<br/>Beta (p<sup>a</sup>)</b> | <b>Model 4<br/>Beta (p<sup>a</sup>)</b> |
|--------------------------------------|-----------------------------------------|-----------------------------------------|-----------------------------------------|-----------------------------------------|
| <b>Socio-demographic factors</b>     |                                         |                                         |                                         |                                         |
| Age                                  |                                         |                                         |                                         |                                         |
| 21-30                                | 1.00                                    | 1.00                                    | 1.00                                    | 1.00                                    |
| 31-40                                | 1.220 (0.302)                           | 1.213 (0.274)                           | 1.195 (0.290)                           | 1.159 (0.269)                           |
| ≥41                                  | 3.723 (0.003)**                         | 3.551 (0.002) **                        | 3.449 (0.002) **                        | 3.412 (0.002)**                         |
| Gender                               |                                         |                                         |                                         |                                         |
| Male                                 | 1.00                                    | 1.00                                    | 1.00                                    | 1.00                                    |
| Female                               | 1.942 (0.040) *                         | 2.158 (0.019) *                         | 2.339 (0.019)*                          | 2.611 (0.003)**                         |
| Education                            |                                         |                                         |                                         |                                         |
| Primary and secondary                | 1.00                                    | 1.00                                    | 1.00                                    | 1.00                                    |
| Pre-college                          | 0.333 (0.848)                           | 1.101 (0.472)                           | 0.535 (0.711)                           | 0.958 (0.504)                           |
| College and above                    | -0.237 (0.899)                          | 0.677 (0.697)                           | 0.449(0.786)                            | 1.642 (0.315)                           |
| Ethnicity                            |                                         |                                         |                                         |                                         |
| Chinese                              | 1.00                                    | 1.00                                    | 1.00                                    | 1.00                                    |
| Malay                                | 0.733 (0.570)                           | 1.614 (0.207)                           | 1.569 (0.190)                           | 1.101 (0.307)                           |
| Indian                               | -0.132 (0.909)                          | -0.340 (0.743)                          | -0.461 (0.673)                          | -1.512 (0.133)                          |
| Others <sup>b</sup>                  | 3.111 (0.209)                           | 3.162 (0.107)                           | 3.585 (0.039)*                          | 3.985 (0.026)*                          |
| Marital status                       |                                         |                                         |                                         |                                         |
| Single <sup>c</sup>                  | 1.00                                    | 1.00                                    | 1.00                                    | 1.00                                    |
| Married                              | -1.757 (0.074)                          | -0.577 (0.542)                          | -0.571 (0.544)                          | -0.450 (0.605)                          |
| Monthly income                       |                                         |                                         |                                         |                                         |
| <S\$4,000                            | 1.00                                    | 1.00                                    | 1.00                                    | 1.00                                    |
| ≥S\$4,000                            | 0.731 (0.407)                           | 0.420 (0.623)                           | 1.476 (0.105)                           | 0.723 (0.399)                           |
| <b>Health and lifestyle factors</b>  |                                         |                                         |                                         |                                         |
| Smoking                              |                                         |                                         |                                         |                                         |
| Non/ex-smoker                        | --                                      | 1.00                                    | --                                      | --                                      |
| Current smoker                       |                                         | 0.380 (0.673)                           |                                         |                                         |
| Alcohol drinking                     |                                         |                                         |                                         |                                         |
| Non-drinker                          | --                                      | 1.00                                    | 1.00                                    | 1.00                                    |
| Drinks less than once a month        |                                         | -0.338 (0.700)                          | -0.441 (0.614)                          | -0.229 (0.784)                          |
| Drinks once or more a month          |                                         | 1.354 (0.223)                           | 1.267 (0.234)                           | 1.279 (0.211)                           |
| Physical activity <sup>d</sup>       |                                         |                                         |                                         |                                         |
| Low                                  | --                                      | 1.00                                    | --                                      | --                                      |
| Moderate                             |                                         | 0.668 (0.419)                           |                                         |                                         |
| High                                 |                                         | 0.531 (0.616)                           |                                         |                                         |
| Self-reported comorbidities          |                                         |                                         |                                         |                                         |
| 0                                    | --                                      | 1.00                                    | --                                      | --                                      |
| ≥1                                   |                                         | -0.445 (0.587)                          |                                         |                                         |
| BMI                                  | --                                      | 0.043 (0.550)                           | --                                      | --                                      |
| Stress at home in previous 12 months |                                         |                                         |                                         |                                         |
| None                                 |                                         | 1.00                                    | 1.00                                    | 1.00                                    |
| Some                                 | --                                      | -4.153 (<0.001)***                      | -3.855 (<0.001)***                      | -2.610 (0.002)**                        |
| Several periods                      |                                         | -10.026 (<0.001)***                     | -8.959 (<0.001)***                      | -7.030 (0.001)**                        |
| Current level of financial stress    |                                         |                                         |                                         |                                         |
| None                                 | --                                      | 1.00                                    | 1.00                                    | 1.00                                    |
| Some                                 |                                         | -1.604 (0.059)                          | -1.365 (0.104)                          | 0.032 (0.970)                           |

|                                       |    |    |                    |                    |                 |
|---------------------------------------|----|----|--------------------|--------------------|-----------------|
| Moderate or severe                    |    |    | -4.598 (<0.001)*** | -4.116 (<0.001)*** | -2.457 (0.030)* |
| <b>Occupational factors</b>           |    |    |                    |                    |                 |
| Shift work                            |    |    |                    |                    |                 |
| No                                    | -- | -- | 1.00               | 1.00               |                 |
| Yes                                   |    |    | 1.483 (0.180)      | 1.308 (0.075)      |                 |
| Job type                              |    |    |                    |                    |                 |
| Office                                | -- | -- | 1.00               | --                 |                 |
| Control room                          |    |    | -1.155 (0.337)     |                    |                 |
| Workshop                              |    |    | -1.040 (0.370)     |                    |                 |
| Stress at work in previous 12 months  |    |    |                    |                    |                 |
| None                                  |    |    | 1.00               | 1.00               |                 |
| Some                                  |    |    | -1.251 (0.232)     | -0.828 (0.380)     |                 |
| Several periods                       |    |    | -4.905 (0.002)**   | -3.414 (0.018)*    |                 |
| Years employed in the current company |    |    |                    |                    |                 |
| <3                                    | -- | -- | 1.00               | 1.00               |                 |
| ≥3                                    |    |    | -1.532 (0.095)     | -1.190 (0.155)     |                 |
| Daily working hours                   | -- | -- | -0.706 (0.007)**   | -0.574 (0.017)*    |                 |
| Work location                         |    |    |                    |                    |                 |
| Aboveground                           | -- | -- | 1.00               | 1.00               |                 |
| Underground                           |    |    | 1.098 (0.206)      | 0.967 (0.235)      |                 |
| <b>Sleep quality</b>                  |    |    |                    |                    |                 |
| Subjective sleep quality              | -- | -- | --                 | -1.415 (0.069)     |                 |
| Sleep latency                         | -- | -- | --                 | -0.809 (0.076)     |                 |
| Sleep duration                        | -- | -- | --                 | -0.027 (0.952)     |                 |
| Habitual sleep efficiency             | -- | -- | --                 | 0.526 (0.235)      |                 |
| Sleep disturbances                    | -- | -- | --                 | 0.243 (0.736)      |                 |
| Use of sleeping medications           | -- | -- | --                 | -0.722 (0.345)     |                 |
| Daytime dysfunction                   | -- | -- | --                 | -2.945 (<0.001)*** |                 |

BMI: body mass index

<sup>a</sup> P was derived using Generalized Linear Modelling.

<sup>b</sup> Includes mixed ethnicities, Indonesians, Pakistanis and Filipinos

<sup>c</sup> Includes never married, widowed and divorced

<sup>d</sup> Physical activity: Low=Metabolic equivalent task mins per week <600, Moderate=Metabolic equivalent task mins per week 600-2999, High=Metabolic equivalent task mins per week ≥3000.

\*p<0.05. \*\*p<0.01. \*\*\*p<0.001.
